# Supplementary material
Source: PubMed Central journal article supplement (PMC3919030)
Supplement: NIHMS535038-supplement-03.pdf [file NIHMS535038-supplement-03.pdf]

## Supplementary Information

### Supplementary Figure 1:

Secondary structure and domain architecture of *S. cerevisiae* Vps4p and multiple sequence alignment with human VPS4A, human VPS4B, and archaeal Vps4 homologs from *S. solfataricus*, *A. hospitalis*, *T. barophilus* and *C. symbiosum*. Sequences were aligned using ClustalW <sup>1</sup>. Secondary structure elements for yeast Vps4p are indicated above the sequence based on mapping of PDB ID: 3EIE <sup>2</sup> and PDB ID: 2V6X <sup>3</sup> on UniProt ID: P52917 using the PDB Protein Feature View <sup>4</sup>. The bar to the right of the sequence alignment denotes domain boundaries for yeast Vps4p. The coloring scheme corresponds to colors used in the sequence alignment and secondary structure assignment.

### Supplementary Figure 2:

Characterization of AhoVps4 oligomerization by size exclusion chromatography. (A) Chromatograms of AhoVps4 (red) and AhoVps4(E206Q) (blue) injected at concentrations of 100  $\mu$ M. In the absence of nucleotide (top panel), both proteins migrate close to the retention volume expected for dodecamers. When the buffer was supplemented with 2 mM magnesium chloride and 1 mM ATP (bottom panel), both proteins migrated as hexamers, with AhoVps4(E200Q) eluting slightly earlier than AhoVps4.

### Supplementary Figure 3:

AhoVps4 crystals contain the full-length protein. SDS-PAGE analysis of AhoVps4 crystals (lane 3) produces a band at the same apparent molecular mass as the 42 kDa full-length AhoVps4 control (compare lane 3 with different concentrations of full-length AhoVps4 in lanes 1 and 2).

# Supplementary Figure 1:

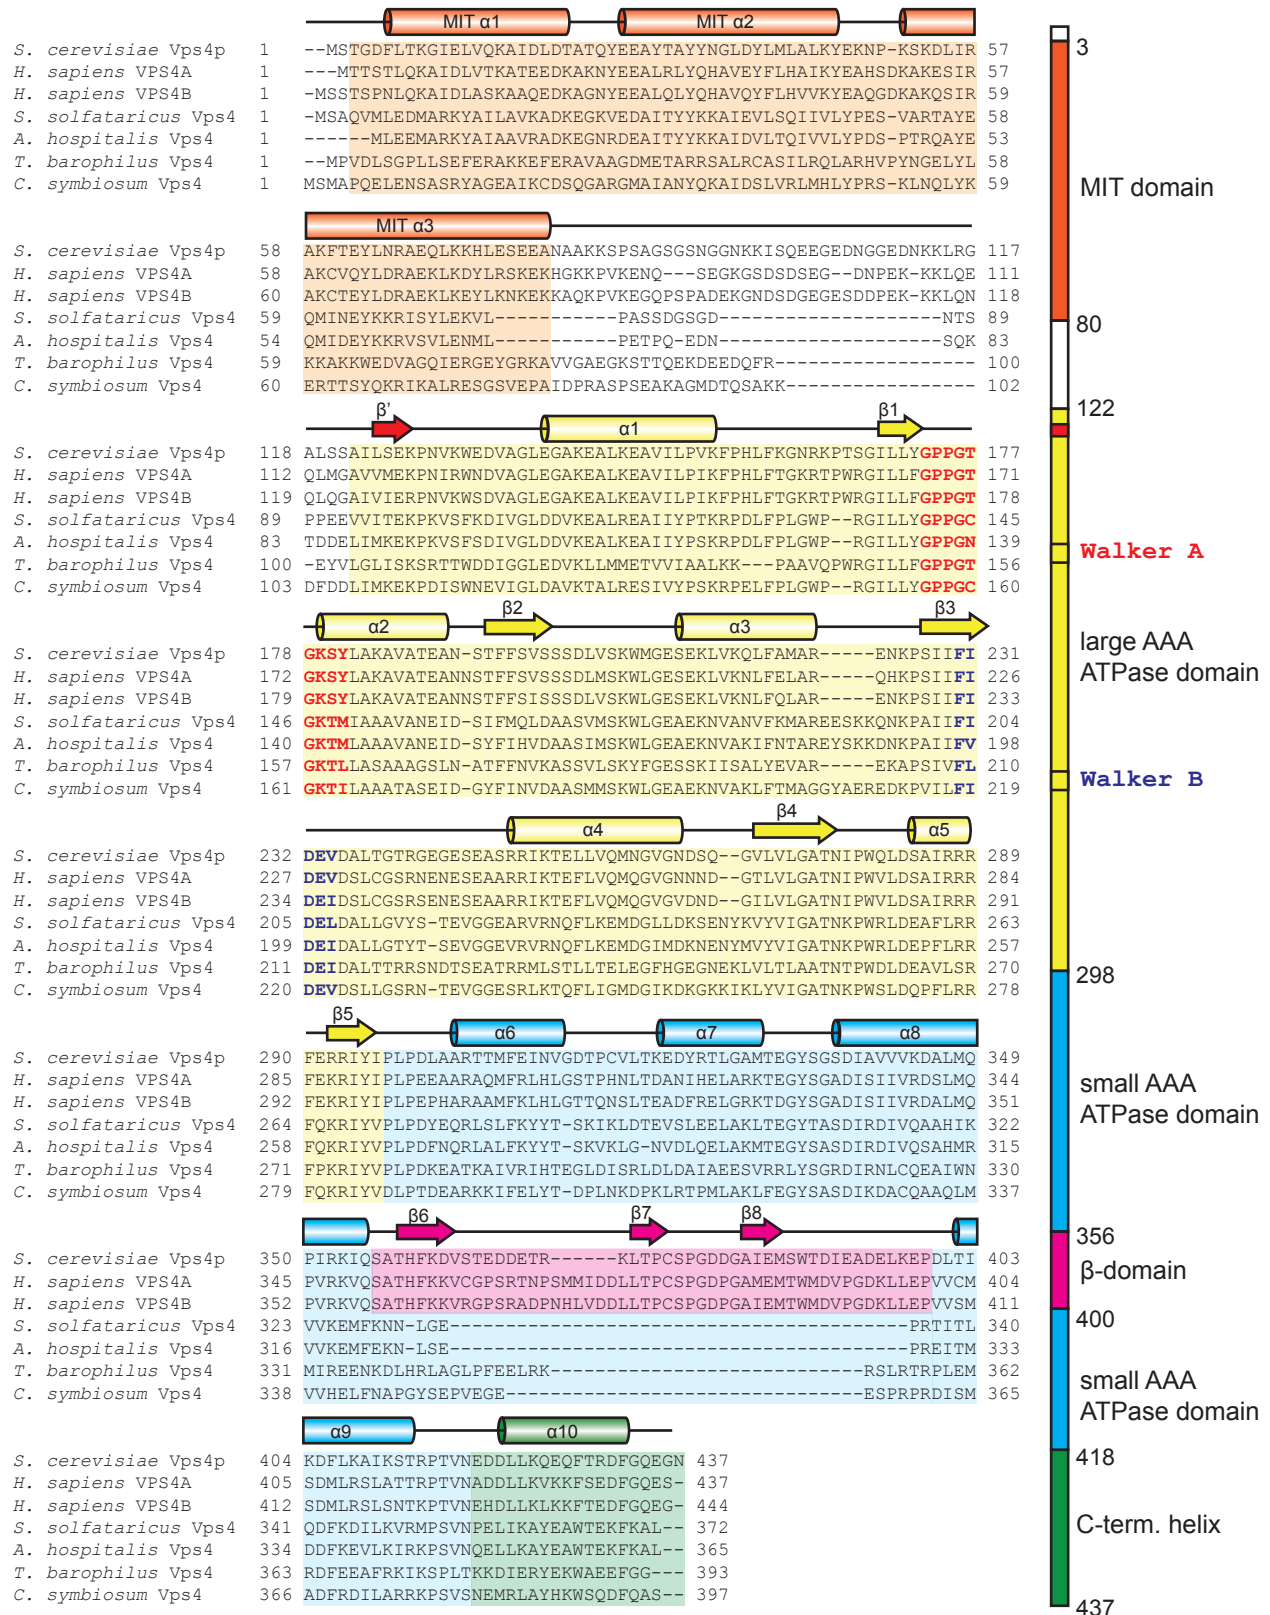

Supplementary Figure 2:

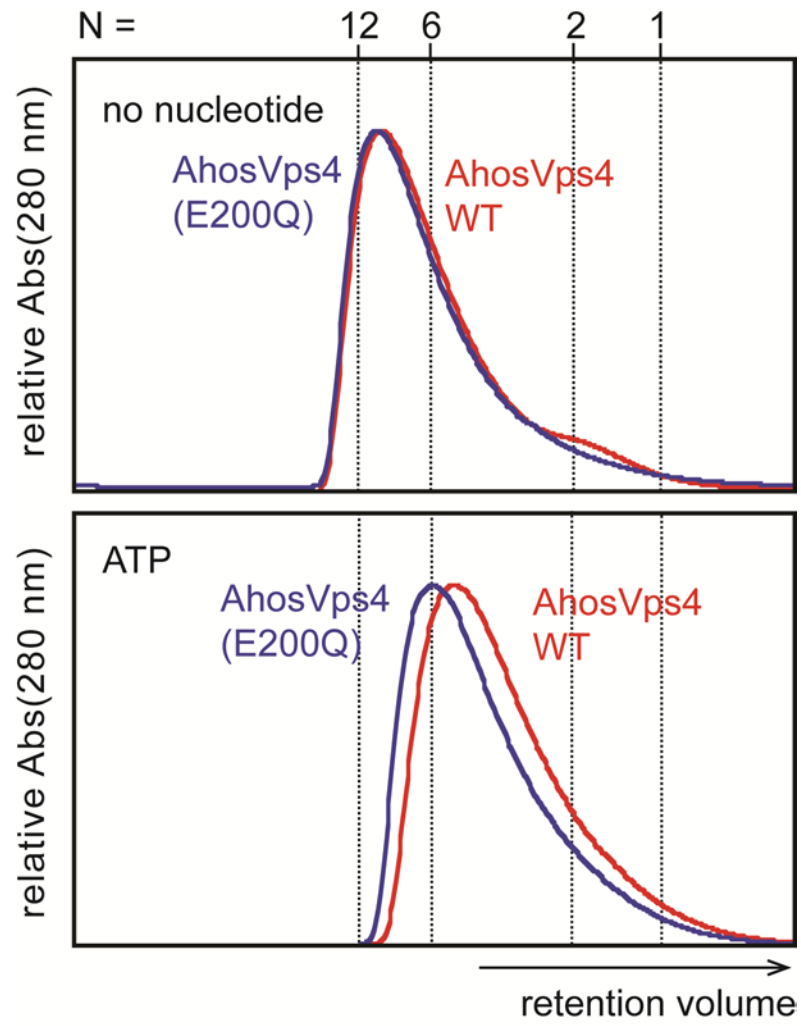

**Supplementary Figure 3:**

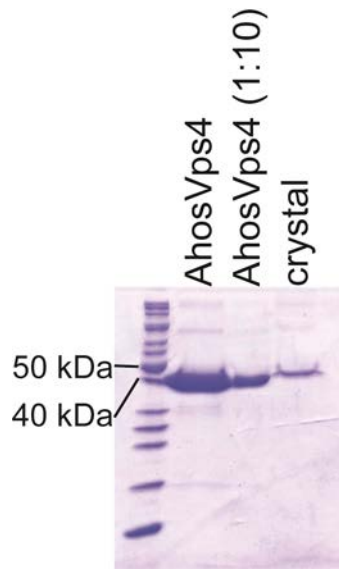

**Supplementary Table 1: Bacterial and yeast expression vectors**

| Plasmid name                     | DNASU ID       | internal ID (Sundquist, Hill) |         |
|----------------------------------|----------------|-------------------------------|---------|
| pET151-D-Topo-Vps4p              | ScCD00586084   | WISP13-150                    | CPH1421 |
| pET151-D-Topo-Vps4p(E233Q)       | ScCD00586086   | WISP13-151                    | CPH1443 |
| pET151-D-Topo-Vps4p(L151D)       | ScCD00586088   | WISP12-144                    | CPH2511 |
| pET151-D-Topo-Vps4p(R352A)       | ScCD00586089   | WISP12-145                    | CPH2512 |
| pET151-D-Topo-Vta1               | ScCD00586091   | WISP12-146                    | CPH1501 |
| pET151-PP-SsoVps4                | SsCD00586092   | WISP11-593                    | CPH2233 |
| pET151-PP-SsoVps4(E206Q)         | SsCD00586093   | WISP11-594                    | CPH2236 |
| pET151-PP-SsoVps4(E206Q, 85-372) | SsCD00586094   | WISP13-152                    | CPH1469 |
| pET151-D-Topo-SsoVps4(Y121D)     | SsCD00586095   | WISP13-153                    | CPH2414 |
| pET151-PP-SsoVps4(F328A)         | SsCD00586096   | WISP13-154                    | CPH2388 |
| pET151-PP-SsoVps4(R262A)         | SsCD00586097   | WISP13-155                    | CPH2555 |
| pET151-PP-SsoVps4(R263A)         | not submitted  | WISP13-156                    | CPH2658 |
| pJExpress414-AhosVps4            | AhCD00586085   | WISP11-484                    | CPH2306 |
| pJExpress414-AhosVps4(E200Q)     | AhCD00586087   | WISP12-67                     | CPH2392 |
| pRS415MET+GFP-CPS                | ScCD00597455   | WISP07-94                     | CPH2844 |
| pRS416+Vps4p                     | to be assigned | WISP07-95                     | CPH2845 |
| pRS416+Vps4p(L151D)              | ScCD00597456   | WISP12-168                    | CPH2846 |
| pRS416+Vps4p(R352A)              | to be assigned | WISP13-79                     | CPH2847 |

## Supplementary References:

1. Thompson, J. D., Higgins, D. G. & Gibson, T. J. (1994). CLUSTAL W: improving the sensitivity of progressive multiple sequence alignment through sequence weighting, position-specific gap penalties and weight matrix choice. *Nucleic acids research* **22**, 4673-80.
2. Gonciarz, M. D., Whitby, F. G., Eckert, D. M., Kieffer, C., Heroux, A., Sundquist, W. I. & Hill, C. P. (2008). Biochemical and structural studies of yeast Vps4 oligomerization. *J Mol Biol* **384**, 878-95.
3. Obita, T., Saksena, S., Ghazi-Tabatabai, S., Gill, D. J., Perisic, O., Emr, S. D. & Williams, R. L. (2007). Structural basis for selective recognition of ESCRT-III by the AAA ATPase Vps4. *Nature* **449**, 735-9.
4. Velankar, S., McNeil, P., Mittard-Runte, V., Suarez, A., Barrell, D., Apweiler, R. & Henrick, K. (2005). E-MSD: an integrated data resource for bioinformatics. *Nucleic acids research* **33**, D262-5.
